# Supplementary material for: Comparative Analysis of Serine/Arginine-Rich Proteins across 27 Eukaryotes: Insights into Sub-Family Classification and Extent of Alternative Splicing
Source: PLoS One. 2011 Sep 14;6(9):e24542. doi: 10.1371/journal.pone.0024542 (PMC3173450; doi:10.1371/journal.pone.0024542)
Supplement: Table S2 — Information on SR genes used in this study. Excel file with accession numbers, sub-family designations, protein lengths, intron number, strand information, molecular weights, revised nomenclature and domain locations and organization of all SR genes used in this study. (XLSX) [file pone.0024542.s015.xlsx]

## Sheet: Glycine max
Database Accession	OTU Label	Tentative Nomenclature	Revised Nomenclature	Molecular Weight	Protein Length	# RRM(s)	RRM Location	# Zinc Finger(s)	Zn Fing. Location	# Introns	Strand	Family
Glyma02g38540.1	Glyma02g38540	GmSCL25-3	GmSCL30	29637.9	253	1	42-115	0		5	+	SCL
Glyma02g41510.1	Glyma02g41510	GmSCL30	GmSCL31	31087.2	276	1	48-121	0		6	+	SCL
Glyma03g01920.1	Glyma03g01920	GmRSp33	GmRS29	29493.5	252	2	3-70; 97-163	0		5	-	RS
Glyma03g33270.1	Glyma03g33270	GmRSZ33-2	GmRS2Z34	34040	299	1	12-77	2	102-118; 124-140	7	+	RS2Z
Glyma03g37240.1	Glyma03g37240	GmSRp34-2	GmSR34	33857.3	299	2	8-78; 112-185	0		14	-	SR
Glyma06g14060.1	Glyma06g14060	GmSRp34a	GmSR34a	33831.2	202	2	8-78; 123-192	0		11	-	SR
Glyma07g05900.1	Glyma07g05900	GmRSp29-2	GmRS31	30579	259	2	3-70; 92-158	0		4	+	RS
Glyma07g38270.1	Glyma07g38270	GmSCL28-1	GmSCL28	28340.3	243	1	50-123	0		6	-	SCL
Glyma08g07730.1	Glyma08g07730	GMSC35	GmSC31	31039.2	267	1	17-90	0		7	+	SC
Glyma08g07940.1	Glyma08g07940	GmRSZ33-4	GmRS2Z21	21281.4	188	1	12-77	0		6	+	RS2Z
Glyma08g39830.1	Glyma08g39830	GmRSZ21-2	GmRSZ21	21366.8	186	1	3-69	1	88-104	4	-	RSZ
Glyma09g15820.1	Glyma09g15820	GmSCL25-1	GmSCL24	24291	205	1	41-114	0		5	+	SCL
Glyma10g38400.1	Glyma10g38400	GmRSp40	GmRS54	53751.9	466	2	77-144; 170-236	0		5	-	RS
Glyma14g07440.1	Glyma14g07440	GmSCL30-2	GmSCL31a	30863.9	271	1	41-114	0		7	-	SCL
Glyma14g17930.3	Glyma14g17930	GmRSZ22-1	GmRSZ20	20260.4	177	1	3-69	1	89-105	5	-	RSZ
Glyma14g36670.1	Glyma14g36670	GmSCL25-2	GmSCL29	29019.2	249	1	42-115	0		5	+	SCL
Glyma15g40710.1	Glyma15g40710	GmSR45	GmSR45(47)	46857.8	422	1	105-178	0		11	+	SR45
Glyma16g02500.1	Glyma16g02500	GmRSp29-1	GmRS31a	31252.7	264	2	3-70; 92-158	0		4	+	RS
Glyma17g02470.1	Glyma17g02470	GmSCL28-2	GmSCL30a	30014.1	254	1	50-123	0		5	+	SCL
Glyma17g29080.1	Glyma17g29080	GmRSZ22-2	GmRSZ20a	20413.6	178	1	3-69	1	89-105	5	+	RSZ
Glyma18g18860.1	Glyma18g18860	GmRSZ21-1	GmRSZ20b	20232.6	177	1	3-69	1	88-104	5	+	RSZ
Glyma19g35980.4	Glyma19g35980	GmRSZ33-3	GmRS2Z29	28722.5	250	1	12-77	2	100-116; 122-138	5	+	RS2Z
Glyma19g35990.1	Glyma19g35990	GmRSZ331-1	GmRS2Z34a	33572.5	297	1	12-77	2	100-116; 122-138	6	+	RS2Z
Glyma19g39850.2	Glyma19g39850	GmSRp34-1	GmSR34b	34011.5	301	2	8-78; 112-185	0		12	-	SR
Glyma20g29460.1	Glyma20g29460	GmRSp40-2	GmRS43	43266.3	376	2	8-75; 101-167	0		5	+	RS
Glyma20g38060.1	Glyma20g38060	GmSRp30	GmSR31	30983.1	271	2	8-78; 112-181	0		9	+	SR
Database URL
http://www.phytozome.net/

## Sheet: Populus trichocarpa
Database Accession	OTU Label	Tentative Nomenclature	Revised Nomenclature	Molecular Weight	Protein Length	# RRM(s)	RRM Location	# Zinc Finger(s)	Zn Fing. Location	# Introns	Strand	Family
POPTR_0001s04350	Pt0001s04350	PtSCL30a	PtSCL32	32047.9	278	1	37-141	0		7	+	SCL
POPTR_0002s15490	Pt0002s15490	PtRSp33-1	PtRS31	31215.8	264	2	3-70; 95-161	0		4	+	RS
POPTR_0002s17560	Pt0002s17560	PtRSp31	PtRS29	29020.2	245	2	4-71; 95-161	0		5	-	RS
POPTR_0002s20650	Pt0002s20650	PtSRp34	PtSR34	33645.1	298	2	8-78; 111-182	0		13	+	SR
POPTR_0003s21240	Pt0003s21240	PtSCL33	PtSCL29	28584.8	245	1	37-110	0		5	+	SCL
POPTR_0005s02450	Pt0005s02450	PtSRp30-2	PtSR32	32358.5	283	2	7-77; 111-180	0		12	+	SR
POPTR_0006s23170	Pt0006s23170	PtRSZ33	PtRS2Z34	33777	293	1	12-77	2	100-116; 122-138	6	+	RS2Z
POPTR_0006s28720	Pt0006s28720	PtRSZ22a	PtRSZ21	21035.2	187	1	3-69	1	96-112	6	-	RSZ
POPTR_0008s05670	Pt0008s05670	PtSCL30-2	PtSCL31	31295.6	274	1	45-118	0		7	+	SCL
POPTR_0010s21070	Pt0010s21070	PtSCL30-1	PtSCL31a	30897	273	1	44-117	0		7	-	SCL
POPTR_0012s02870	Pt0012s02870	PtSRp34a-2	PtSR31	30802.2	279	2	8-78; 125-194	0		8	-	SR
POPTR_0012s13920	Pt0012s13920	PtRSp41	PtRS43	42533.5	370	2	3-70; 96-162	0		5	+	RS
POPTR_0013s01700	Pt0013s01700	PtSRp30-1	PtSR34a	33852	296	2	7-77; 111-180	0		13	+	SR
POPTR_0014s07270	Pt0014s07270	PtRSp33-2	PtRS30	29795.8	249	2	3-70; 96-162	0		5	-	RS
POPTR_0014s09730	Pt0014s09730	PtRSp31a	PtRS29a	28877.1	243	2	4-71; 98-164	0		7	-	RS
POPTR_0014s12440	Pt0014s12440	PtSRp34b	PtSR33	33404.8	296	2	8-78; 113-184	0		13	+	SR
POPTR_0015s00690	Pt0015s00690	PtSRp34a-1	PtSR29	29312.5	260	2	8-78; 114-183	0		13	+	SR
POPTR_0015s13880	Pt0015s13880	PtRSp40	PtRS41	41244.2	355	2	3-70; 96-162	0		6	+	RS
POPTR_0016s08250	Pt0016s08250	PtRSZ32	PtRS2Z33	33077.2	287	1	12-77	2	100-116; 122-138	5	+	RS2Z
POPTR_0018s03390	Pt0018s03390	PtRSZ22	PtRSZ22	21672.7	198	1	3-70	1	100-116	6	-	RSZ
Database URL
http://www.phytozome.net/

## Sheet: Arabidopsis thaliana
Database Accession	Temp OTU Label	Revised Nomenclature	Protein Length	# RRM(s)	RRM Location	# Zinc Finger(s)	Zn Fing. Location	# Introns	Strand	Family
AT1G02840	AtSRp34	AtSR34	303	2	8-78; 120-193	0		12	+	SR
AT1G09140	AtSRp30	AtSR30	268	2	8-78; 110-183	0		11	-	SR
AT1G16610	AtSR45	AtSR45	414	1	99-172	0		11	-	SR45
AT1G23860	AtSRZ21	AtRSZ21	187	1	3-69	1	90-106	5	-	RSZ
AT1G55310	AtSCL33	AtSCL33	220	1	37-110	0		5	+	SCL
AT2G24590	AtRSZ22a	AtRSZ22a	196	1	3-67	1	97-113	5	+	RSZ
AT2G37340	AtRSZ33	AtRS2Z33	290	1	12-77	2	100-116; 122-138	6	-	RS2Z
AT2G46610	AtRSp31a	AtRS31a	250	2	3-70; 96-162	0		5	-	RS
AT3G13570	AtSCL30a	AtSCL30a	262	1	38-111	0		5	-	SCL
AT3G49430	AtSRp34a	AtSR34a	300	2	8-78; 123-196	0		12	+	SR
AT3G53500	AtRSZ32	AtRS2Z32	243	1*	3-35	2	59-75; 81-97	6	-	RS2Z
AT3G55460	AtSCL30	AtSCL30	262	1	48-121	0		7	+	SCL
AT3G61860	AtRSp31	AtRS31	264	2	3-70; 94-160	0		5	-	RS
AT4G02430	AtSRp34b	AtSR34b	178	2	8-78; 121-178	0		12	+	SR
AT4G25500	AtSRp40	AtRS40	350	2	3-70; 98-164	0		5	+	RS
AT4G31580	AtRSZ22	AtRSZ22	200	1	3-67	1	100-116	5	+	RSZ
AT5G18810	AtSCL28	AtSCL28	236	1	48-121	0		6	-	SCL
AT5G52040	AtSRp41	AtRS41	356	2	3-70; 97-163	0		5	+	RS
AT5G64200	AtSC35	AtSC35	303	1	17-90	0		8	-	SC
Database used:
http://www.arabidopsis.org

## Sheet: Vitis vinifera
Database Accession	Temp OTU Label	Tentative Nomenclature	Revised Nomenclature	Molecular Weight	Protein Length	# RRM(s)	RRM Location	# Zinc Finger(s)	Zn Fing. Location	# Introns	Strand	Family
Vvinifera|GSVIVT00008658001|chrUn_random|GSVIVT00008658001	Vv8658001	VvRSp31	VvRS22	21994.8	185	2	3-70; 94-160	0		4	-	RS
Vvinifera|GSVIVT00015240001|chr18|GSVIVT00015240001	Vv15240001	VvSC35	VvSC30	29815.9	257	1	17-90	0		7	-	SC
Vvinifera|GSVIVT00023097001|chr8|GSVIVT00023097001	Vv23097001	VvRSZ33-1	VvRS2Z32	32437.8	283	1	12-77	2	104-120; 126-142	8	+	RS2Z
Vvinifera|GSVIVT00024777001|chr6|GSVIVT00024777001	Vv24777001	VvSCL25	VvSCL32	31668.4	240	1	39-148	0		7	+	SCL
Vvinifera|GSVIVT00025760001|chr19|GSVIVT00025760001	Vv25760001	VvSR45	VvSR45	45538.4	411	1	103-176	0		12	-	SR45
Vvinifera|GSVIVT00026247001|chr15|GSVIVT00026247001	Vv26247001	VvRSp33	VvRS29	29257.5	248	2	3-70; 96-162	0		5	+	RS
Vvinifera|GSVIVT00027992001|chr7|GSVIVT00027992001	Vv27992001	VvSRp34	VvSR37	37011.1	329	2	8-78; 112-183	0		11	+	SR
Vvinifera|GSVIVT00029498001|chr13|GSVIVT00029498001	Vv29498001	VvRSZ33-2	VvRS2Z33	32728.8	288	1	12-77	2	103-119; 125-141	7	-	RS2Z
Vvinifera|GSVIVT00037180001|chr16|GSVIVT00037180001	Vv37180001	VvSRp34a	VvSR23	22973.9	201	2	8-78; 113-182	0		8	-	SR
Database URL
http://www.phytozome.net/

## Sheet: Zea mays
Database Accession	Temp OTU Label	Tentative Nomenclature	Revised Nomenclature	Molecular Weight	Protein Length	# RRM(s)	RRM Location	# Zinc Finger(s)	Zn Fing. Location	# Introns	Strand		Family
GRMZM2G005743_P01	Zm2G005743	ZmRSp33-1	ZmRS19	18627.1	157	2	3-70; 96-151	0		5	-		RS
GRMZM2G008436_P01	Zm2G008436	ZmSCL30b	ZmSCL30	29566.6	258	1	39-112	0		7	-		SCL
GRMZM2G021223_P01	Zm2G021223	ZmRSp29-2	ZmRS28	27604.6	239	2	3-70; 94-160	0		4	+		RS
GRMZM2G032969_P02	Zm2G032969	ZmSRp20	ZmSR30	30132.2	263	2	11-81; 114-183	0		13	+		SR
GRMZM2G052166_P01	Zm2G052166	ZmRSp29-1	ZmRS26	25971.9	223	2	3-70; 94-160	0		4	+		RS
GRMZM2G060594_P02	Zm2G060594	ZmSCL25	ZmSCL25	24588.2	209	1	38-111	0		5	-		SCL
GRMZM2G064612_P01	Zm2G064612	ZmRSp31	ZmRS30	30376.7	255	2	3-70; 94-160	0		5	+		RS
GRMZM2G077823_P05	Zm2G077823	ZmSC35b	ZmSC30	29844.1	251	1	18-91	0		10	+		SC
GRMZM2G080930_P01	Zm2G080930	ZmRSp21b	ZmRSZ20	19910	173	1	3-69	1	87-103	5	-		RSZ
GRMZM2G083322_P01	Zm2G083322	ZmRSZp23	ZmRSZ28	28284.4	253	1	3-69	1	86-102	3	-		RSZ
GRMZM2G083975_P01	Zm2G083975	ZmRSZ39	ZmRS2Z24	23611.1	210	1*	5-35	2	60-76; 82-98	4	+		RS2Z
GRMZM2G099317_P02	Zm2G099317	ZmRSZ37-1	ZmRS2Z37	37135.5	333	1	12-77	2	103-119; 125-141	6	+		RS2Z
GRMZM2G104353_P01	Zm2G104353	ZmSC35c	ZmSC25	25358	216	1	17-90	0		6	+		SC
GRMZM2G110143_P01	Zm2G110143	ZmSC35a	ZmSC30a	29585.9	256	1	17-90	0		7	-		SC	pos selection
GRMZM2G121269_P01	Zm2G121269	ZmRSp33-2	ZmRS32	32433.6	287	2	3-70; 96-162	0		5	-		RS
GRMZM2G126895_P01	Zm2G126895	ZmSCL26	ZmSCL25a	24804.8	216	1	40-113	0		5	+		SCL
GRMZM2G133926_P01	Zm2G133926	ZmSR45	ZmSR45(47)	47008.6	422	1	103-176	0		11	-		SR45
GRMZM2G133964_P01	Zm2G133964	ZmSRp32	ZmSR28	27596.5	245	2	8-78; 113-184	0		10	-		SR
GRMZM2G151923_P01	Zm2G151923	ZmRSZp21a	ZmRSZ21	20946.2	184	1	3-69	1	88-104	6	-		RSZ
GRMZM2G159539_P01	Zm2G159539	ZmRSZ36	ZmRS2Z37a	36365.4	325	1	12-77	2	103-119; 125-141	6	+		RS2Z
GRMZM2G170365_P04	Zm2G170365	ZmSRp33a	ZmSR30a	30231.6	264	2	8-78; 110-181	0		11	-		SR	pos selection
GRMZM2G175330_P01	Zm2G175330	ZmRSZ37-2	ZmRS2Z39	39006.4	353	1	12-77	2	103-119; 125-141	6	-		RS2Z
Database used:
http://www.maizesequence.org/index.html

## Sheet: Sorgum bicolor
Database Accession	OTU Label	Tentative Nomenclature	Revised Nomenclature	Molecular Weight	Protein Length	# RRM(s)	RRM Location	# Zinc Finger(s)	Zn Fing. Location	# Introns	Strand	Family
Sbicolor|Sb01g033710|chromosome_1|Sb01g033710.1	Sb01g033710	SbSC35c-1	SbSC25	25422	216	1	17-90	0		7	+	SC
Sbicolor|Sb01g034200|chromosome_1|Sb01g034200.1	Sb01g034200	SbSCL26	SbSCL25	24771.7	213	1	38-111	0		5	+	SCL
Sbicolor|Sb01g034590|chromosome_1|Sb01g034590.1	Sb01g034590	SbSCL28	SbSCL22	22233.9	190	1	58-131	0		5	-	SCL
Sbicolor|Sb01g035680|chromosome_1|Sb01g035680.1	Sb01g035680	SbSRp32	SbSR32	31657.8	286	2	8-78; 114-185	0		13	-	SR
Sbicolor|Sb01g049590|chromosome_1|Sb01g049590.1	Sb01g049590	SbRSp31	SbRS32	31938.2	266	2	3-70; 94-160	0		3	+	RS
Sbicolor|Sb02g039740|chromosome_2|Sb02g039740.1	Sb02g039740	SbSC35c-2	SbSC30	29688.9	250	1	17-90	0		11	+	SC
Sbicolor|Sb02g040350|chromosome_2|Sb02g040350.1	Sb02g040350	SbSCL25	SbSCL25a	24549.2	209	1	38-111	0		5	+	SCL
Sbicolor|Sb03g005500|chromosome_3|Sb03g005500.1	Sb03g005500	SbRSZ37-3	SbRS2Z34	34190.2	296	1	25-90	2	116-132; 138-154	6	+	RS2Z
Sbicolor|Sb03g013010|chromosome_3|Sb03g013010.1	Sb03g013010	SbSRp20	SbSR21	21323.6	186	2	8-78; 111-180	0		8	+	SR
Sbicolor|Sb03g046480|chromosome_3|Sb03g046480.1	Sb03g046480	SbSR45	SbSR45(47)	47750.3	428	1	106-179	0		11	+	SR45
Sbicolor|Sb04g001910|chromosome_4|Sb04g001910.1	Sb04g001910	SbRSp33	SbRS34	33784	295	2	3-70; 96-162	0		5	-	RS
Sbicolor|Sb04g025670|chromosome_4|Sb04g025670.1	Sb04g025670	SbRSZp23	SbRSZ28	27772.8	246	1	3-69	1	86-102	4	-	RSZ
Sbicolor|Sb04g035540|chromosome_4|Sb04g035540.1	Sb04g035540	SbRSp21b	SbRSZ19	18649.7	163	1	3-69	1	87-103	5	-	RSZ
Sbicolor|Sb05g027700|chromosome_5|Sb05g027700.1	Sb05g027700	SbSCL30	SbSCL31	30774	270	1	41-114	0		7	-	SCL
Sbicolor|Sb06g001100|chromosome_6|Sb06g001100.1	Sb06g001100	SbRSp29	SbRS28	27746.7	238	2	3-70; 94-160	0		5	-	RS
Sbicolor|Sb07g029000|chromosome_7|Sb07g029000.1	Sb07g029000	SbSC35a	SbSC32	31527	273	1	17-90	0		7	+	SC	pos selection
Sbicolor|Sb09g001910|chromosome_9|Sb09g001910.1	Sb09g001910	SbRSZ37-1	SbRS2Z38	38051.5	341	1	12-77	2	103-119; 125-141	6	-	RS2Z
Sbicolor|Sb09g001920|chromosome_9|Sb09g001920.1	Sb09g001920	SbRSZ36	SbRS2Z35	35231.3	312	1	12-77	2	103-119; 125-141	6	+	RS2Z
Sbicolor|Sb09g018110|chromosome_9|Sb09g018110.1	Sb09g018110	SbSRp33a	SbSR32a	31578	278	2	8-78; 110-179	0		13	+	SR	pos.selection
Sbicolor|Sb10g005960|chromosome_10|Sb10g005960.1	Sb10g005960	SbRSZp21a	SbRSZ21	21342.6	186	1	3-69	1	88-104	5	+	RSZ
Database URL:
http://www.phytozome.net/

## Sheet: Oryza sativa
Database Accession	OTU Label	Revised Nomenclature	Protein Length	# RRM(s)	RRM Location	# Zinc Finger(s)	Zn Fing. Location	# Introns	Strand	Family
Os01g06290	OsRSZ37a	OsRS2Z37	324	1	19-84	2	110-126; 132-148	6	-	RS2Z
Os01g21420	OsSRp20	OsSR40	349	2	146-194; 227-296	0		16	+	SR
Os01g72890	Os01g72890	OsSR45	432	1	108-181	0		11	+	SR45
Os02g03040	OsRSp33	OsRS33	279	2	3-70; 96-162	0		5	-	RS
Os02g15310	OsSCL30a	OsSCL30a	265	1	38-111	0		7	-	SCL
Os02g39720	OsRSZp23	OsRSZ23	203	1	3-69	1	87-103	4	-	RSZ
Os02g54770	OsRSp21b	OsRSZ21	185	1	3-69	1	87-103	7	-	RSZ
Os03g17710	OsRSZ37b	OsRS2Z38	335	1	12-77	2	109-125; 131-147	6	-	RS2Z
Os03g22380	OsSRp32	OsSR32	286	2	8-78; 112-185	0		13	+	SR
Os03g24890	Os03g24890	OsSCL28	243	1	62-135	0		6	+	SCL
Os03g25770	OsSCL26	OsSCL26	218	1	38-111	0		5	-	SCL
Os03g27030	OsSC35c	OsSC25	206	1	17-90	0		7	-	SC
Os04g02870	OsRSp29	OsRS29	245	2	3-70; 95-161	0		5	-	RS
Os05g01540	Os05g01540	OsSR45a	380	1	67-140	0		10	+	SR45
Os05g02880	OsRSZ36	OsRS2Z36	323	1	12-77	2	103-119; 125-141	6	-	RS2Z
Os05g07000	OsRSZ39	RS2Z39	338	1	19-84	2	109-125; 131-147	6	-	RS2Z
Os05g30140	OsSRp33a	OsSR33a	294	2	8-78; 109-178	0		14	+	SR	pos selection
Os06g08840	OsRSZp21a	OsRSZ21a	185	1	3-69	1	88-104	7	+	RSZ
Os07g43050	OsSC35b	OsSC32	275	1	17-90	0		8	+	SC
Os07g43950	OsSCL25	OsSCL25	213	1	39-112	0		5	+	SCL
Os07g47630	OsSRp33b	OsSR33	296	2	8-78; 109-178	0		13	-	SR
Os08g37960	OsSC35a	OsSC34	289	1	17-90	0		8	-	SC	pos selection
Os11g47830	Os11g47830	OsSCL57	502	1	36-109	0		14	-	SCL
Os12g38430	OsSCL30b	OsSCL30	263	1	38-111	0		7	-	SCL
Database URL:
http://rice.plantbiology.msu.edu/

## Sheet: Selaginella moellendorfii
Database Accession	OTU Label	Revised Nomenclature	Molecular Weight	Protein Length	# RRM(s)	RRM Location	# Zinc Finger(s)	Zn Fing. Location	# Introns	Family
Smoellendorffii|1852565_locus|scaffold_1|403662	Smo403662	SR45(38)	37504.4	327	1*	12-63	0		9	SR45
Smoellendorffii|1860413_locus|scaffold_64|446044	Smo446044	SR45(40)	39924.5	354	1*	60-133	0		8	SR45
Smoellendorffii|1858930_locus|scaffold_3|68846	Smo68846	SmRSZ20	20237.5	181	1*	3-69	1	96-112	3	RSZ
Smoellendorffii|1854431_locus|scaffold_5|82477	Smo82477	SmRS25	25162.3	214	2	3-70; 97-163	0		3	RS
Smoellendorffii|1872022_locus|scaffold_19|97566	Smo97566	SmSR33	32569.1	288	2	7-77; 122-195	0		9	SR
Database URL:
http://www.phytozome.net/

## Sheet: Physcomitrella patens
Database Accession	OTU Label	Revised Nomenclature	Molecular Weight	Protein Length	# RRM(s)	RRM Location	# Zinc Finger(s)	Zn Fing. Location	# Introns	Strand	Family
estExt_fgenesh1_pm.C_350034	Pp105411	PpSR45(43)	43078	394	1	89-162	0		11	+	SR45
jgi|Phypa1_1|108464|estExt_fgenesh1_pm.C_2700006	Pp108464	Pp108464	49247.4	435	2	57-130; 221-280	1	298-314	6	-	SCL	but has ZF
e_gw1.7.233.1	Pp113630	PpSR31	31074.6	279	2	8-78; 126-196	0		8	-	SR
jgi|Phypa1_1|122960|e_gw1.42.218.1	Pp122960	PpSC30	30058.2	259	1	17-90	0		6	-	SC
e_gw1.173.63.1	Pp140978	PpSR27	27154.3	240	2	8-78; 111-183	0		10	+	SR
e_gw1.183.81.1	Pp141868	PpSCL30	29547	257	1	43-116	0		3	-	SCL
e_gw1.207.127.1	Pp143810	PpRSZ19	19177.5	174	1	3-69	1	87-103	3	-	RSZ
jgi|Phypa1_1|166555|estExt_fgenesh1_pg.C_1180104	Pp166555	PpSR45(44)	44130.3	400	1	87-160	0		14	+	SR45
estExt_fgenesh1_pg.C_1440043	Pp167387	PpRS27	27074.2	233	2	7-74; 101-167	0		5	+	RS
jgi|Phypa1_1|168193|estExt_fgenesh1_pg.C_1690028	Pp168193	PpSCL42	42157.2	370	1	49-191	0		9	+	SCL
estExt_fgenesh1_pg.C_3970019	Pp172957	PpSC37	36676.4	319	1	17-90	0		7	+	SC
jgi|Phypa1_1|205547|estExt_Genewise1.C_280136	Pp205547	PpSR29	29262.5	262	2	8-78; 124-198	0		9	+	SR
jgi|Phypa1_1|87421|fgenesh1_pg.scaffold_157000058	Pp87421	PpSR45(37)	37302.6	340	1	67-147	0		9	-	SR45
PpRSZ38	PpRSZ38	PpRS2Z38	38388.2	346	1	44-109	2	136-152; 158-174	ND	ND	RS2Z
PpRSZ37	PpRSZ37	PpRS2Z37	36684.3	331	1	45-106	2	136-152; 158-174	5	ND	RS2Z
Database URL
http://www.phytozome.net/

## Sheet: Chlamydomonas reinhardtii
Database Accession	OTU Label	Revised Nomenclature	Molecular Weight	Protein Length	# RRM(s)	RRM Location	# Zinc Finger(s)	Zn Fing. Location	# Introns	Strand	Family
Creinhardtii|1838019_locus|scaffold_2|188086	Cr188086	CrSCL34	33954.1	286	1	52-125	0		7	-	SCL
Creinhardtii|1829186_locus|scaffold_54|195844	Cr195844	Cr195844	25538	224	1	3-69	0		5	+	RSZ	but no ZF
Creinhardtii|1829189_locus|scaffold_30|195845	Cr195845	CrRSZ22	22101.4	200	1	4-68	1	103-119	4	+	RSZ
Creinhardtii|1829191_locus|scaffold_38|195847	Cr195847	CrSR36	36119.2	320	2	36-106; 134-209	0		5	-	SR
Creinhardtii|1829192_locus|scaffold_1|195849	Cr195849	CrSR35	35215.6	338	2	5-75; 170-243	0		7	-	SR
CrRSp18	CrRSp18	CrRS19	19601.7	167	1	8-75	0		3	+	UG
CrRSp35	CrRSp35	CrRS35	34902.2	298	2	8-75; 93-159	0		7	+	RS
Database used:
http://genome.jgi-psf.org/chlamy/chlamy.home.html

[truncated: 18 more sheets: Chlorella vulgaris, Cyanidioschyzon merolae, Homo sapiens, Mus musculus, Gallus gallus, Xenopus tropicalis, Danio rerio, Branchiostoma floridae, Ciona intestinalis, Drosophila melanogaster, Anopheles gambiae, Aedes aegyptii, Caenorhabditis elegans, Neurospora crassa, Schizosaccharomyces pombe, Dictyostelium discoiedum, Plasmoidum falciparum, Phytophthora sojae]
